# Supplementary material for: Elevated CO2 Modulates Plant Hydraulic Conductance Through Regulation of PIPs Under Progressive Soil Drying in Tomato Plants
Source: Front Plant Sci. 2021 May 28;12:666066. doi: 10.3389/fpls.2021.666066 (PMC8218578; doi:10.3389/fpls.2021.666066)
Supplement: Supplementary file 1 [file Data_Sheet_1.docx]

## Supplementary data

**Figure S1.** Transpiration rate (*E*; **A**), leaf and root hydraulic conductance (*K*leaf; **B**, and *K*root; **C**)of well-watered AC and *flacca* grown under ambient (400 ppm) and elevated (800 ppm) atmospheric CO2 concentrations after progressive soil drying. Different letters on the top of the columns indicate significant difference between the treatments by Tukey’s test at P < 0.05. Error bars indicate standard error of the means (S.E.) (N=4).

**Table S1.** *PIP*, *OST1* and reference gene specific settings in quantitative real time PCR (RT-qPCR) runs and analyses.

**Figure S1**

**
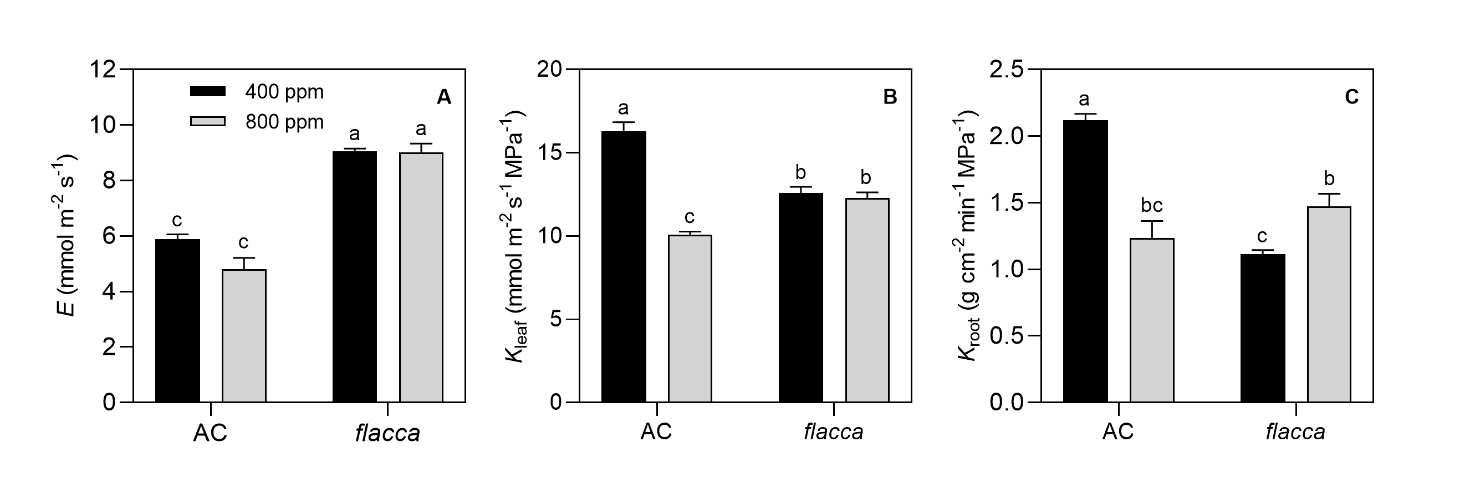
**

**Table S1**

| Target  gene | Temperature in RT-qPCR (°C) | Primer pair performance | | Sequence |
| --- | --- | --- | --- | --- |
| Efficiency | R2 |
| *PIP1.3*a | 60 | 94.7 | 0.998 | F: 5’- GGCTACCATTCCAATCACCG -3’ |
| R: 5’- ATGATGATAGTTCACCAGG -3’ |
| *PIP2.1*a | 60 | 92.1 | 0.997 | F: 5’- GTGCTGCTGTTGTTTATGGACA -3’ |
| R: 5’- CATCCAACACAACTCTAACAAC -3’ |
| *PIP2.4*a | 60 | 100.3 | 0.998 | F: 5’- CAATGGTGACAAGGCGTGG -3’ |
| R: 5’- GAAGGCGAATTCATAGGAT -3’ |
| *PIP2.8*a | 61.9 | 95.6 | 0.997 | F: 5’- GGAGCTGCTGTTATTGCTGA -3’ |
| R: 5’- GCACAGATCCAAGGCTAAGA -3’ |
| *PIP2.9*a | 61.9 | 95.3 | 0.997 | F: 5’- GCAATGGCAGCAGCAATATACCA -3’ |
| R: 5’- CGAAAGAGAATAGACCACCA -3’ |
| *OST1*b | 60 | 92.2 | 0.996 | F: 5’-CAGTTTGAGGAGCCAGATCA-3’ |
| R: 5’-GTCATCGTCAATGTCCAAGC-3’ |
| *TIP4.1*c | 60 | 100.7 | 0.998 | F: 5’-ATGGAGTTTTTGAGTCTTCTGC-3’ |
| R: 5’-GCTGCGTTTCTGGCTTAGG-3’ |
| *SAND*c | 58.4 | 101.1 | 0.997 | F: 5’-TTGCTTGGAGGAACAGACG-3’ |
| R: 5’-GCAAACAGAACCCCTGAATC-3’ |
| *CAC*c | 61.9 | 107.3 | 0.997 | F: 5’-CCTCCGTTGTGATGTAACTGG-3’ |
| R: 5’-ATTGGTGGAAAGTAACATCATCG-3’ |
| *EXPR*c | 60 | 99.1 | 0.996 | F: 5’-GCTAAGAACGCTGGACCTAATG-3’ |
| R: 5’-TGGGTGTGCCTTTCTGAATG-3’ |

aReuscher, S., Akiyama, M., Mori, C., Aoki, K., Shibata, D., Shiratake, K., 2013. Genome-wide identification and expression analysis of aquaporins in tomato. PLoS One 8, e79052. https://doi.org/10.1371/journal.pone.0079052

b Shi, K., Li, X., Zhang, H., Zhang, G., Liu, Y., Zhou, Y., Xia, X., Chen, Z., Yu, J., 2015. Guard cell hydrogen peroxide and nitric oxide mediate elevated CO2-induced stomatal movement in tomato. New Phytol. 208, 342–353. https://doi.org/10.1111/nph.13621

cExpósito-Rodríguez, M., Borges, A.A., Borges-Pérez, A., Pérez, J.A., 2008. Selection of internal control genes for quantitative real-time RT-PCR studies during tomato development process. BMC Plant Biol. 8, 1–12. https://doi.org/10.1186/1471-2229-8-131
